# Supplementary material
Source: PubMed Central journal article supplement (PMC6926144)
Supplement: NIHMS1535070-supplement-1.pdf [file NIHMS1535070-supplement-1.pdf]

**Supplementary Table 1: Anatomic distribution and adjusted odds ratios (ORs) for tumor development at specific anatomic site compared to trunk for men and women**

|                        | Non-carriers |      | CDKN2A carriers |      | CDK4 carriers |      | CDKN2A carriers vs. Non-carriers |           | CDK4 carriers vs. Non-carriers |           | CDK4 carriers vs. CDKN2A carriers |           | CDKN2A carriers vs. Non-carriers | CDK4 carriers vs. Non-carriers | CDK4 carriers vs. CDKN2A carriers |
|------------------------|--------------|------|-----------------|------|---------------|------|----------------------------------|-----------|--------------------------------|-----------|-----------------------------------|-----------|----------------------------------|--------------------------------|-----------------------------------|
|                        | N            | %    | N               | %    | N             | %    | OR <sup>1</sup>                  | 95% CI    | OR <sup>1</sup>                | 95% CI    | OR <sup>1</sup>                   | 95% CI    | Global P-value                   | Global P-value                 | Global P-value                    |
| <b>Female</b>          |              |      |                 |      |               |      |                                  |           |                                |           |                                   |           |                                  |                                |                                   |
| <b>Total melanomas</b> | 73           | 100% | 186             | 100% | 34            | 100% |                                  |           |                                |           |                                   |           |                                  |                                |                                   |
| <b>Anatomic site</b>   |              |      |                 |      |               |      |                                  |           |                                |           |                                   |           | 0.14 <sup>2</sup>                | 0.004 <sup>2</sup>             | 0.001 <sup>2</sup>                |
| Trunk                  | 39           | 53%  | 56              | 30%  | 3             | 9%   | Reference                        | Reference | Reference                      | Reference | Reference                         | Reference |                                  |                                |                                   |
| Non-Truncal            | 34           | 47%  | 130             | 70%  | 31            | 91%  | 3.54**                           | 1.80-6.94 | 13.6**                         | 3.62-50.9 | 3.84*                             | 1.10-13.4 | 0.04 <sup>3</sup>                | 0.0002 <sup>3</sup>            | 0.0001 <sup>3</sup>               |
| Lower extremities      | 14           | 19%  | 56              | 30%  | 17            | 50%  | 3.94*                            | 1.68-9.21 | 18.4**                         | 4.34-78.1 | 4.68*                             | 1.26-17.4 |                                  |                                |                                   |
| Upper extremities      | 12           | 16%  | 52              | 28%  | 12            | 35%  | 3.06*                            | 1.31-7.15 | 11.1*                          | 2.48-49.9 | 3.63                              | 0.90-14.7 |                                  |                                |                                   |
| Head and neck          | 8            | 11%  | 22              | 12%  | 2             | 6%   | 4.01                             | 0.96-16.8 | 9.73                           | 0.74-128  | 2.43                              | 0.22-26.3 |                                  |                                |                                   |
| <b>Male</b>            |              |      |                 |      |               |      |                                  |           |                                |           |                                   |           | <b>Global P-value</b>            | <b>Global P-value</b>          | <b>Global P-value</b>             |
| <b>Total melanomas</b> | 84           | 100% | 162             | 100% | 20            | 100% |                                  |           |                                |           |                                   |           |                                  |                                |                                   |
| <b>Anatomic site</b>   |              |      |                 |      |               |      |                                  |           |                                |           |                                   |           | 0.14 <sup>2</sup>                | 0.046 <sup>2</sup>             | 0.006 <sup>2</sup>                |
| Trunk                  | 48           | 57%  | 77              | 48%  | 4             | 20%  | Reference                        | Reference | Reference                      | Reference | Reference                         | Reference |                                  |                                |                                   |
| Non-Truncal            | 36           | 43%  | 85              | 53%  | 16            | 80%  | 2.02                             | 0.87-4.69 | 8.62*                          | 1.80-41.2 | 4.27*                             | 1.03-17.7 | 0.046 <sup>3</sup>               | 0.10 <sup>3</sup>              | 0.007 <sup>3</sup>                |
| Lower extremities      | 8            | 10%  | 21              | 13%  | 5             | 25%  | 1.95                             | 0.66-5.81 | 9.38*                          | 1.78-49.4 | 4.80*                             | 1.17-19.8 |                                  |                                |                                   |
| Upper extremities      | 16           | 19%  | 27              | 17%  | 5             | 25%  | 0.96                             | 0.39-2.35 | 2.90                           | 0.59-14.3 | 3.03                              | 0.70-13.1 |                                  |                                |                                   |
| Head and neck          | 12           | 14%  | 37              | 23%  | 6             | 30%  | 5.96*                            | 1.56-22.7 | 25.6*                          | 3.26-202  | 4.30                              | 0.83-22.5 |                                  |                                |                                   |

\*  $P < .05$

\*\*  $P < .001$

<sup>1</sup> Multinomial random effects model adjusting for within individual and within family correlations, age at diagnosis, and superficial spreading melanoma subtype

<sup>2</sup> Global p-value comparing differences in melanoma distribution (trunk, lower extremities, upper extremities, or head and neck) between groups with adjustments for within individual and within family correlations, age at diagnosis, and superficial spreading melanoma subtype

<sup>3</sup> Global p-value comparing differences in melanoma distribution (trunk or non-truncal) between groups with adjustments for within individual and within family correlations, age at diagnosis, and superficial spreading melanoma subtype

**Supplementary Table 2: Anatomic distribution and adjusted odds ratios (ORs) for tumor development at specific anatomic site compared to trunk according to median age of diagnosis**

|                                     | Non-carriers |      | CDKN2A carriers |      | CDK4 carriers |      | CDKN2A carriers vs. Non-carriers |           | CDK4 carriers vs. Non-carriers |           | CDK4 carriers vs. CDKN2A carriers |           | CDKN2A carriers vs. Non-carriers | CDK4 carriers vs. Non-carriers | CDK4 carriers vs. CDKN2A carriers |
|-------------------------------------|--------------|------|-----------------|------|---------------|------|----------------------------------|-----------|--------------------------------|-----------|-----------------------------------|-----------|----------------------------------|--------------------------------|-----------------------------------|
|                                     | N            | %    | N               | %    | N             | %    | OR <sup>1</sup>                  | 95% CI    | OR <sup>1</sup>                | 95% CI    | OR <sup>1</sup>                   | 95% CI    | Global P-value                   | Global P-value                 | Global P-value                    |
| <b>≤39 years old<sup>4</sup></b>    |              |      |                 |      |               |      |                                  |           |                                |           |                                   |           |                                  |                                |                                   |
| <b>Total melanomas</b>              | 48           | 100% | 203             | 100% | 30            | 100% |                                  |           |                                |           |                                   |           |                                  |                                |                                   |
| <b>Anatomic site</b>                |              |      |                 |      |               |      |                                  |           |                                |           |                                   |           | 0.046 <sup>2</sup>               | 0.06 <sup>2</sup>              | 0.003 <sup>2</sup>                |
| Trunk                               | 30           | 63%  | 87              | 43%  | 6             | 20%  | Reference                        | Reference | Reference                      | Reference | Reference                         | Reference |                                  |                                |                                   |
| Non-Truncal                         | 18           | 38%  | 116             | 57%  | 24            | 80%  | 2.77*                            | 1.32-5.85 | 8.11**                         | 2.60-25.3 | 2.92*                             | 1.10-7.77 | 0.03 <sup>3</sup>                | 0.007 <sup>3</sup>             | 0.0003 <sup>3</sup>               |
| Lower extremities                   | 6            | 13%  | 35              | 17%  | 10            | 33%  | 2.18                             | 0.78-6.11 | 11.9**                         | 2.84-50.2 | 5.49*                             | 1.68-18.0 |                                  |                                |                                   |
| Upper extremities                   | 8            | 17%  | 52              | 26%  | 10            | 33%  | 3.05*                            | 1.16-8.01 | 6.95*                          | 1.77-27.4 | 2.28                              | 0.74-7.05 |                                  |                                |                                   |
| Head and neck                       | 4            | 8%   | 29              | 14%  | 4             | 13%  | 3.47                             | 0.83-14.6 | 6.41                           | 0.89-46.2 | 1.85                              | 0.39-8.76 |                                  |                                |                                   |
| <b>&gt;39 years old<sup>4</sup></b> |              |      |                 |      |               |      |                                  |           |                                |           |                                   |           |                                  |                                |                                   |
| <b>Total melanomas</b>              | 109          | 100% | 145             | 100% | 24            | 100% |                                  |           |                                |           |                                   |           |                                  |                                |                                   |
| <b>Anatomic site</b>                |              |      |                 |      |               |      |                                  |           |                                |           |                                   |           | 0.15 <sup>2</sup>                | 0.01 <sup>2</sup>              | 0.006 <sup>2</sup>                |
| Trunk                               | 57           | 52%  | 46              | 32%  | 1             | 4%   | Reference                        | Reference | Reference                      | Reference | Reference                         | Reference |                                  |                                |                                   |
| Non-Truncal                         | 52           | 48%  | 99              | 68%  | 23            | 96%  | 3.45*                            | 1.01-11.8 | 58.0*                          | 2.99-999  | 16.8*                             | 1.08-263  | 0.04 <sup>3</sup>                | 0.048 <sup>3</sup>             | 0.007 <sup>3</sup>                |
| Lower extremities                   | 16           | 15%  | 42              | 29%  | 12            | 50%  | 3.18*                            | 1.21-8.36 | 43.8*                          | 4.16-460  | 13.6*                             | 1.41-133  |                                  |                                |                                   |
| Upper extremities                   | 20           | 18%  | 27              | 19%  | 7             | 29%  | 1.19                             | 0.53-2.69 | 9.61                           | 1.00-92.7 | 8.01                              | 0.85-75.2 |                                  |                                |                                   |
| Head and neck                       | 16           | 15%  | 30              | 21%  | 4             | 17%  | 8.19*                            | 1.67-40.2 | 97.5*                          | 4.08-999  | 12.0                              | 0.78-185  |                                  |                                |                                   |

\*  $P < .05$

\*\*  $P < .001$

<sup>1</sup> Multinomial random effects model adjusting for within individual and within family correlations, gender, and superficial spreading melanoma subtype

<sup>2</sup> Global p-value comparing differences in melanoma distribution (trunk, lower extremities, upper extremities, or head and neck) between groups with adjustments for within individual and within family correlations, gender, and superficial spreading melanoma subtype

<sup>3</sup> Global p-value comparing differences in melanoma distribution (trunk or non-truncal) between groups with adjustments for within individual and within family correlations, gender, and superficial spreading melanoma subtype

<sup>4</sup> Median age of diagnosis for all tumors (first and subsequent melanomas diagnosed) in the three groups (Non-carriers, *CDKN2A* carriers, *CDK4* carriers)

**Supplementary Table 3: Anatomic distribution and adjusted odds ratios (ORs) for tumor development at specific anatomic site compared to trunk for first and subsequent melanomas**

|                                                         | Non-carriers |      | CDKN2A carriers |      | CDK4 carriers |      | CDKN2A carriers vs. Non-carriers |           | CDK4 carriers vs. Non-carriers |           | CDK4 carriers vs. CDKN2A carriers |           | CDKN2A carriers vs. Non-carriers | CDK4 carriers vs. Non-carriers | CDK4 carriers vs. CDKN2A carriers |
|---------------------------------------------------------|--------------|------|-----------------|------|---------------|------|----------------------------------|-----------|--------------------------------|-----------|-----------------------------------|-----------|----------------------------------|--------------------------------|-----------------------------------|
|                                                         | N            | %    | N               | %    | N             | %    | OR <sup>1</sup>                  | 95% CI    | OR <sup>1</sup>                | 95% CI    | OR <sup>1</sup>                   | 95% CI    | Global P-value                   | Global P-value                 | Global P-value                    |
| <b>First primary melanoma</b>                           |              |      |                 |      |               |      |                                  |           |                                |           |                                   |           |                                  |                                |                                   |
| <b>Total melanomas</b>                                  | 117          | 100% | 161             | 100% | 24            | 100% |                                  |           |                                |           |                                   |           |                                  |                                |                                   |
| <b>Anatomic site</b>                                    |              |      |                 |      |               |      |                                  |           |                                |           |                                   |           | <.0001 <sup>2</sup>              | 0.30 <sup>2</sup>              | 0.01 <sup>2</sup>                 |
| Trunk                                                   | 65           | 56%  | 70              | 44%  | 5             | 21%  | Reference                        | Reference | Reference                      | Reference | Reference                         | Reference |                                  |                                |                                   |
| Non-Truncal                                             | 52           | 44%  | 91              | 57%  | 19            | 79%  | 1.98*                            | 1.07-3.67 | 6.17*                          | 1.97-19.3 | 3.12*                             | 1.07-9.11 | 0.04 <sup>3</sup>                | 0.03 <sup>3</sup>              | 0.002 <sup>3</sup>                |
| Lower extremities                                       | 16           | 14%  | 31              | 19%  | 6             | 25%  | 2.21                             | 0.95-5.14 | 7.81*                          | 1.79-34.0 | 2.99                              | 0.81-11.1 |                                  |                                |                                   |
| Upper extremities                                       | 22           | 19%  | 33              | 21%  | 9             | 38%  | 2.04                             | 0.27-15.2 | N.E.                           | N.E.      | 4.44*                             | 1.12-17.6 |                                  |                                |                                   |
| Head and neck                                           | 14           | 12%  | 27              | 17%  | 4             | 17%  | N.E.                             | N.E.      | N.E.                           | N.E.      | 8.41                              | 0.02-999  |                                  |                                |                                   |
| <b>Melanomas diagnosed after first primary melanoma</b> |              |      |                 |      |               |      |                                  |           |                                |           |                                   |           |                                  |                                |                                   |
| <b>Total melanomas</b>                                  | 40           | 100% | 187             | 100% | 30            | 100% |                                  |           |                                |           |                                   |           |                                  |                                |                                   |
| <b>Anatomic site</b>                                    |              |      |                 |      |               |      |                                  |           |                                |           |                                   |           | 0.07 <sup>2</sup>                | 0.01 <sup>2</sup>              | 0.0008 <sup>2</sup>               |
| Trunk                                                   | 22           | 55%  | 63              | 34%  | 2             | 7%   | Reference                        | Reference | Reference                      | Reference | Reference                         | Reference |                                  |                                |                                   |
| Non-Truncal                                             | 18           | 45%  | 124             | 66%  | 28            | 93%  | 7.12*                            | 1.78-28.6 | 63.8**                         | 5.68-717  | 8.97*                             | 1.26-64.1 | 0.03 <sup>3</sup>                | 0.006 <sup>3</sup>             | 0.0008 <sup>3</sup>               |
| Lower extremities                                       | 6            | 15%  | 46              | 25%  | 16            | 53%  | 5.95*                            | 1.46-24.3 | 45.4**                         | 6.06-340  | 7.61*                             | 1.57-36.8 |                                  |                                |                                   |
| Upper extremities                                       | 6            | 15%  | 46              | 25%  | 8             | 27%  | 3.80*                            | 1.05-13.8 | 13.6*                          | 1.81-102  | 3.58                              | 0.66-19.3 |                                  |                                |                                   |
| Head and neck                                           | 6            | 15%  | 32              | 17%  | 4             | 13%  | 20.9*                            | 2.18-201  | 130*                           | 5.89-999  | 6.19                              | 0.69-55.8 |                                  |                                |                                   |

\*  $P < .05$

\*\*  $P < .001$

N.E. (no estimate)

<sup>1</sup> Multinomial random effects model adjusting for within individual and within family correlations, age at diagnosis, gender, and superficial spreading melanoma subtype

<sup>2</sup> Global p-value comparing differences in melanoma distribution (trunk, lower extremities, upper extremities, or head and neck) between groups with adjustments for within individual and within family correlations, age at diagnosis, gender, and superficial spreading melanoma subtype

<sup>3</sup> Global p-value comparing differences in melanoma distribution (trunk or non-truncal) between groups with adjustments for within individual and within family correlations, age at diagnosis, gender, and superficial spreading melanoma subtype
